# Supplementary material for: Separation of DNA Replication from the Assembly of Break-Competent Meiotic Chromosomes
Source: PLoS Genet. 2012 May 17;8(5):e1002643. doi: 10.1371/journal.pgen.1002643 (PMC3355065; doi:10.1371/journal.pgen.1002643)
Supplement: Table S3 — Axis sites identified in this study. (XLS) [file pgen.1002643.s011.xls]

## Sheet: axis_sites_over1_WT.txt
Columns Definitions:
Region_IDs	systematic name of feature with enriched signal
CHR	chromosome
START	coordinate of first enriched feature in peak
END	coordinate of last enriched feature in peak
NUM_MERGED_SPOTS	number of enriched features in peak
PEAK	Site of highest enrichment within the peak.
Region_IDs	CHR	START	END	NUM_MERGED_SPOTS	PEAK
33178;1911	5	24711	25080	2	25080
4005;38593;36133;17841;18015;8850;20836	1	51334	52561	7	51870
189;16576;8421;814	12	852055	852638	4	852055
43780;31704;40143;4980	3	63900	65036	4	63900
8774;26166;9821;8099;7124;42405;17534;10997	15	935801	937630	8	936685
30918;2114	8	391978	392475	2	391978
23746;8597;19750;1572	16	50721	51911	4	51272
40443;35134;35483	3	192886	194139	3	194139
39156;39055;42337	15	113236	113931	3	113931
25546;39561;29985	11	77085	77588	3	77588
27049;8462;26080;35714	5	96399	97587	4	96609
4522;21561;42685;38701;20207;8436	14	70682	72186	6	71495
32569;25133;40546;24241;32195;36395;9435	4	639668	641585	7	639961
11798;9041;42643;16379;22757;11749	16	509912	512008	6	510581
35373;209	4	555236	555544	2	555236
21638;5388;22394;5591;34124	3	259465	260241	5	260052
18216;12966	15	1057708	1057972	2	1057972
17454;3432;13331;6283	14	469244	470660	4	469964
17742;8447;29052	7	468697	469097	3	468973
514;43285;38040;6506;32149	4	53305	54411	5	53833
27547;41498;19475	14	144034	144432	3	144213
5100;1390;24797;27992;15253;29074;17294;35278;6171;8887	13	110172	112675	10	111559
13183;13266;27356;20464;32921;26444;20130;41085;38249	10	324033	326530	9	326005
11685;40498;41004;8925;11821;26878;23961;34494;34070	5	366427	368960	9	367674
13725;2150;36477;37560;14970	12	693918	695100	5	694988
1683;40851;4164;27430;20241;39849	11	41944	43542	6	42692
2790;42099	12	373065	373818	2	373818
38283;38785;40711;10549	5	331872	332906	4	332332
3344;6408;8517;38038	8	45594	46695	4	45829
25609;42728;2641	16	880786	881919	3	880786
40633;19083;26494;9418;17858;37307;34652;31468;10043;27523;7610;14275;14458;24649	1	133520	138416	14	134219
11473;27323;41563;16842	2	631397	632240	4	631903
40416;29350;9052;23241;30246	13	596961	598144	5	596961
35350;42263;32073	9	303310	304004	3	303310
21190;10879;3293;475;12788;7576	4	1067420	1069035	6	1068659
41667;11003	7	89367	89990	2	89990
41606;21733;40024	12	881820	882389	3	882020
7969;2109	5	449709	449999	2	449999
27034;26011;15931	16	863776	864531	3	864071
32671;33204;3839;16328;42833;22420;8297;39713	2	319829	321721	8	320244
16454;29167;29975;36646	16	885589	886476	4	885589
17085;29337;16360;28685;22564;38953;40232;41243	6	215400	217230	8	216397
29665;34539;28911;9560;5255;13906;1148	16	486235	488669	7	488669
11047;21343	15	489292	489827	2	489827
26327;17844	13	18824	18970	2	18970
7653;10677;35579;37187;9099;18969	12	821911	823250	6	822610
24650;33222;15560;3168;41228;29229;39060;38617;25176;15019;26431	16	395530	398405	11	396761
3988;23789;9970;21334;24647;19886;20225	11	265024	266692	7	265669
14959;6610	16	773504	773807	2	773807
2957;34510;39522;2954;8401;6657;18034	7	101151	102911	7	102432
889;32780;16332;25621	9	316676	318067	4	318067
42189;42996;17842;33932	9	143614	144868	4	144222
35903;35338	7	778297	778627	2	778627
35121;26735;16141;37369;15547	4	1190669	1191825	5	1191825
9305;42766;38603;27857;39929	4	400371	401399	5	400689
40512;39624;26152	12	429159	429539	3	429539
40760;27411	15	729667	729928	2	729667
36290;33719;18359;33911	7	644437	645325	4	644954
42690;10029;11095;38640	10	273814	274872	4	274331
34971;34861;22742;10035	7	1013795	1014553	4	1014216
37628;30828;29908;33544	6	97524	99019	4	99019
10566;34203;8181;23095;8639;13429	13	73718	75031	6	74287
41089;36331;29377	10	282976	283377	3	283217
5231;4742	15	224237	224431	2	224431
40044;43452	10	91175	91662	2	91662
15485;10864;34501;18229	3	29224	30555	4	29548
12114;30739	5	323892	324180	2	324180
28173;31233;22108	7	359988	360307	3	360307
30906;4185	4	129791	130310	2	129791
27874;29271;29997	4	1147154	1147606	3	1147154
25245;9530;24816;30050;36385;39159;12635;23135;38703	5	164315	167004	9	164450
34942;1398;22691;13974;5090;24913	12	578007	579679	6	578274
33154;20450;17652;19322;1958	10	124783	126441	5	125928
40698;30882;18520	9	295818	296207	3	295985
29225;33922;21143;21157;5652	7	611771	613304	5	611771
25036;30191;14574;11060;37557;12903	11	573358	576005	6	574329
10671;34569;42432;28178;3908;33123	10	297952	299225	6	298719
42555;4715;29673;17592	15	964822	966431	4	966431
25038;34310;5882	4	778929	780178	3	779736
38830;9912;24433;29579	7	116899	117855	4	117614
20804;43618	4	1499272	1499805	2	1499805
5111;30711;18898;32747;12	14	611480	612641	5	612024
40671;2960;42387	15	651361	652056	3	651361
7924;43698	14	420409	421280	2	421280
33176;24257	15	822295	822443	2	822443
33474;25007;32702;4109;5956;21609	1	65133	67030	6	65703
37091;36554;4703;6479;34399;13454	7	297236	298954	6	298131
41315;24416;43900;930;2480;9118	15	321014	322633	6	322142
9473;2390	4	964950	965252	2	964950
5285;5330;28319;24624;41251	10	395080	396966	5	395298
33884;20732;37554;11382;12158	10	416334	417138	5	416988
30684;40667;10710;7817;19706	4	25383	26643	5	26069
38091;7464;33942;12927;41985	4	697663	698975	5	698135
30280;42446;34469;30706;34383	16	316189	318027	5	318027
40265;23447;10196;28446	11	108741	110161	4	110161
14172;40411;21921;28358	5	188897	189692	4	188897
43946;39317	11	393929	394428	2	394428
26710;38280;28511	15	199568	200211	3	199948
41292;8324;11087;8000;26242;12356	11	388572	389981	6	388752
43839;37608;4146;29374;3304;37085;1485	5	528392	530098	7	529487
31089;26600;26970;40378;22219	16	636804	637878	5	637358
38446;16601	2	351846	352070	2	351846
35330;15054;12388;29188;34447	15	735131	736661	5	736207
31303;43141	14	299389	299528	2	299528
33150;9241	7	379604	379769	2	379604
25201;27058;22101;2217;27306;13223	1	171259	172424	6	171895
40611;12211	2	235069	235227	2	235069
23803;33152;29524;25815	16	250052	250699	4	250509
38682;26674;22282;39795;6803;31773;28904;16168	16	599435	601547	8	600477
9536;10915;41580	16	909588	910072	3	909808
40878;34435;8138;33219;4798;38171;13341;38507;40174;40647;6341;64;43850;3358;29716;8464;41484	1	146392	152295	17	147650
25113;21687;13072;18675	3	217812	218367	4	218212
8739;5914;29288;36771;472	9	364566	365402	5	364704
66;33538;8102;33312;18304;32740	11	55076	56276	6	55692
2504;22214;25683;34117;24780;12126;21341	4	712198	713705	7	713025
17674;607;41114;19659;9548	11	85464	86441	5	86118
34400;7645	13	717938	718407	2	718407
34088;26023	15	59742	60118	2	60118
41902;43646	4	673365	673512	2	673365
20623;29336;40704	14	505187	505730	3	505531
31054;36537;33139;6150;20186;36013;10747;33432	10	344718	347377	8	346247
15596;15033;18341;28973;33689;27100	8	135087	137048	6	135279
6034;27902;33428;5539	3	54730	55383	4	54940
17414;42828;33508;2038;28628	14	195371	196522	5	196285
14492;39914;34332;38544	4	1145002	1146079	4	1145002
23117;30845	10	697754	698008	2	698008
26667;1785;27855;40939	14	437226	438471	4	438348
37928;13541	4	338101	338246	2	338101
42921;2356;32451;38235;20276;19227;780	9	341202	342825	7	341657
27142;41117;21374;33849;19713;40005;20744;2535	12	266253	268241	8	267878
1111;38042;34870;20210;1480	7	948254	949282	5	949282
36650;7237;8061;11499	4	509218	509774	4	509332
26408;11032;3683;39084;26061;22590;17709;39765;9219;41440;7967	6	171323	174156	11	172306
29820;33991	10	643125	643559	2	643125
21297;43358;7249;8489	2	498488	499427	4	499427
19402;3922;16937;12018	4	623658	624748	4	624748
35431;1571;30922	12	69856	70875	3	70875
20916;5550;2873;8857	10	39971	41196	4	40739
10059;28048	2	333782	334076	2	334076
25175;5243;18277	15	238466	238915	3	238466
31865;16922;37123;6887;31729;21912;36220;36274	8	256981	258874	8	258141
1966;16117;3785;12833	15	778255	779233	4	778401
11996;35319;6275;18843;3050	12	799570	800933	5	799570
20110;1995;5267;28827;13670	11	632283	633820	5	633010
6509;23016;34527;16846	15	751433	752070	4	752070
42155;29411;2507;25354;42894	2	540654	541632	5	541632
11404;41168;3723	15	766594	766952	3	766773
24929;33275;9497;27989;33256	4	253056	254157	5	253672
12052;32651;8521;32877;35458;34907	12	381695	383376	6	382373
39228;11561;28603;37062;10631;10431	8	156628	158033	6	156628
29939;40140;38930;7267;4796;3402;38324;3337	12	209271	211297	8	210391
40093;6522;39884;40658;30645;29144;21125	3	190203	191640	7	191490
39806;40271	13	234512	234678	2	234678
20831;20230;34107;32617	2	50515	51129	4	50515
29221;4134;6832	13	863913	864220	3	864071
3411;3976	9	162815	163006	2	163006
33193;27214;5887;22265	4	117178	118868	4	117953
25500;1932	7	674820	675437	2	674820
33008;42650;33780;41246	14	214630	215778	4	215353
39083;35512;20436;15773;37408	16	331586	332537	5	332034
38248;3241;9586;35487;27384	7	681894	683253	5	682215
39949;38839;41949;26229;3059;24304;12077;3169;31462	15	279882	282247	9	280180
8813;33465	11	159230	159510	2	159510
17621;450;19105	3	43617	44559	3	43617
40330;13912;40592;12580;36705	2	480195	481949	5	480347
460;41553	4	263061	263288	2	263288
8775;38723;38787;32058;5733	8	326214	327299	5	326635
7190;31227;22856;2293	16	532955	533694	4	533425
23928;39574;11868;20281;42249;3462	1	155868	157085	6	156603
43057;768;25770	4	1474489	1475001	3	1474712
38841;24616;27230;23244	13	173629	174235	4	174051
9958;32473	12	1054816	1055747	2	1055747
38065;8703;4885;34988	12	305959	307339	4	306765
8991;34048;33396;35811	5	35524	36319	4	35524
18719;24249;17653;6354	12	563215	563797	4	563399
7876;818;6842;17935;13770	4	193870	194803	5	194326
8093;28239;34917;41188	4	372618	374577	4	372618
3539;5343;27112;16091;3852	2	394881	396047	5	395244
8731;32055	12	793762	794220	2	793762
14630;15257;10083;20620;30415	13	489218	491108	5	490322
11144;7674;25969	15	608460	609026	3	609026
33850;10811;2670;24873;43673;3960	8	493773	496263	6	495991
15789;28797;29621;31745;20128;42872	4	659951	661195	6	661057
5864;38907;32429;37158;35192	14	475447	476647	5	475955
39496;3218;32300;11883	15	468741	469472	4	469326
14318;6215;27198;16918	5	28779	29717	4	29717
14690;20901;38635	13	202268	202654	3	202514
36422;14627;35003	13	549442	550847	3	550052
1067;7939	4	1344240	1344530	2	1344240
11206;8484	12	927995	928590	2	927995
37964;24213	7	697081	697280	2	697081
28234;12273;41001;15924	4	91749	92548	4	92548
19647;7305;35616;28624;21142	5	520623	521534	5	520813
22125;9705;6746;23429	6	42299	43328	4	42558
1416;43083;40263;18197;42946;31384	8	160709	161927	6	161509
9403;23528;23352	9	87800	88250	3	88062
8712;11366	5	412839	413132	2	413132
30404;39399;17272;30338;662;6940;6332	7	724588	726246	7	724846
1875;26875;37013	13	425928	426394	3	426140
6318;4794	10	612637	612838	2	612838
22218;28687;43638;31785;26291;5297	1	9999	11571	6	11421
5868;21077;35972;39648;4251;5572	13	506958	508251	6	507354
36898;1566;20848;37525;8207	13	854931	855788	5	855788
3589;101	11	432403	432666	2	432403
22570;2195	16	275926	276188	2	275926
32003;20215;25047;39201;12206	12	120935	122088	5	121096
2484;24103;42600;30291;15818	9	79995	81264	5	80437
22971;19888;4584;16878;21791;15043	16	471730	472863	6	472249
9990;38185;16755;15782;28747;34686;29557;23362	2	173520	175543	8	174737
20783;25616;27420;16325	3	130368	131550	4	130523
42200;2611;41752;12268;19294;23722	14	397133	398526	6	397738
3044;24982;30578;34678;38027;40694;16152;34704	14	124651	126702	8	126702
17088;4805;39964;21183;20312;18948;3520	7	139004	140474	7	139556
40670;3277;2197	15	44970	45768	3	45768
40629;3129;36846;986;38132;24735	10	250240	252276	6	251391
32251;6650;22820;28644;26871	11	378032	378879	5	378264
35645;38103;41822	8	520443	520822	3	520507
35447;25529;25534;9360;10293	12	506644	508413	5	508413
28497;10456;10774;24448;38905;4035	5	553300	555592	6	555377
37996;20880	8	362539	362762	2	362762
10074;34230;33866;39535	4	1379314	1380190	4	1379868
9915;32201;13283;13662;32168;4530	13	578460	579745	6	578628
8193;30323;8091	9	30413	30755	3	30755
22718;34685;37613	4	309394	310225	3	309394
13201;3247;38050;37083	10	233715	234471	4	233956
16574;32852;10434;7347	16	619065	620357	4	619065
22710;14483	2	143870	144683	2	143870
28699;28352;13268;24867;40855;40168;18370	15	538355	539681	7	539548
38997;8756;14190;18942;23390	12	127457	129076	5	129076
17741;6777;29861	15	451182	451846	3	451846
2753;9747;15815;4639	13	747975	749217	4	748869
34703;22581;34903;29490;40786;4620;6971;42867;4724	7	629896	632348	9	631434
7358;37886;6225;26578	4	863412	864635	4	864635
26555;7318;10987;4560	7	25490	26176	4	25490
35375;22585;34916	14	749937	750344	3	750088
43108;9369;4329;16901;29625;42812	9	326943	328563	6	328004
21318;24955;11728;6424;43687	4	1119844	1120952	5	1120474
36254;12183;23271;12127;15020	15	132035	133405	5	132827
33582;39073;18310	15	636914	637312	3	636914
20646;32527;32913;37358;34822;33260	15	482869	484557	6	483153
22330;14432;23339	4	440741	441084	3	440914
39850;42341;10800	15	917736	918531	3	918531
25357;39024;10108;26858;30478;42039	4	1314144	1315533	6	1315125
37433;39655;22637;8004;14487	4	839529	841203	5	840571
20345;2918	10	673219	673375	2	673375
16232;38698	1	159793	160010	2	160010
16220;4648;43218;25186	4	791439	792419	4	792028
41364;27408	9	217357	217627	2	217357
30869;41725;27575	2	572864	573598	3	573598
9571;32390;3707;7047;26993	12	104625	105558	5	105558
35895;22734	15	497168	497745	2	497168
25163;2226	11	212076	212388	2	212076
32090;41206;27723;26985;40220;34775	15	983388	984794	6	984278
31253;23375;9404;31844;3440;36516;7215	3	100590	102276	7	101784
1844;37181	11	220848	221544	2	220848
8081;27180	1	101166	101387	2	101387
2357;3308;40860;30653	14	256349	257445	4	256603
36514;39769;2883;17282;5081;7515	16	715138	716588	6	716264
3522;27824	7	763170	763365	2	763365
9308;30394;3270;17153;16433;42835;2855	5	186216	187667	7	186994
18760;33085;8881;31219	15	298915	300576	4	300576
37683;33393	15	247860	248398	2	247860
20046;6356	4	764023	764235	2	764023
9158;35873;4245	8	393834	394324	3	394088
12535;4441;28309;27700;35905;14705;28982	15	148730	150777	7	150351
12670;38289	15	507052	507853	2	507052
9285;13640;43811	13	255872	256520	3	255872
41934;7093;512;19816	8	79279	80545	4	80545
8396;32484;24730;13959;5302	5	255906	256699	5	256166
39259;19520;29033;16734	16	674409	675230	4	675230
3759;29463;9719;37780	5	457520	458222	4	457754
37887;41796;40293;7608;1435;35173;12894;8261	1	196331	197763	8	196716
8111;7982	15	414181	414398	2	414398
42325;11772;9787;43250;21271	13	442174	443856	5	443245
32941;34968	15	548575	548872	2	548575
31558;35725	10	55894	56742	2	55894
17080;2362;41312	6	93209	93653	3	93653
5678;16494;26164;35071	12	520299	520999	4	520299
41193;37285;14228;21094;25351	4	491699	492842	5	492320
29171;40890	11	330338	330496	2	330496
43572;26347;37754;27734;38738;3229;29478;25083	2	654582	656567	8	654748
36843;20778;23962	7	274344	274910	3	274586
43413;25431	10	147321	147494	2	147494
19701;41657;39260;18121;37344;38557;3212	4	829477	832478	7	829477
20978;32054;22159;4000;43259;5505	2	672750	674005	6	673095
7636;6942;27880;16828;33022;15998;21804;29523;32437;18274;18552	7	1037160	1039760	11	1039390
42820;2493;39272;25029	12	394047	395183	4	394588
19382;597;24951	11	376119	377029	3	377029
30178;33163	15	265155	265341	2	265155
24831;4701	6	161454	161688	2	161454
1337;37826;34709	10	209095	209694	3	209694
5472;24145	8	233366	233648	2	233366
4692;8351;39354	7	476203	476733	3	476369
30823;34980;2536;21387	4	1437227	1438624	4	1437979
6055;14117;7419;22283;32592;40436;38216	1	126247	128117	7	126783
37270;37538	2	469008	469515	2	469008
39124;27423;42321	13	635181	636058	3	635871
365;8175;4520;1513	2	732008	732683	4	732148
36109;15828;34268	10	688923	689880	3	688923
34496;31898;23820;28044;36971;40910;19593;19867;8647	16	443139	446094	9	445263
17525;7685	15	715376	715536	2	715376
34727;11322;13726;2392;33127	14	648116	649501	5	648919
30760;36836;37723;24941	4	899088	900050	4	899412
20641;8921;1956	7	553997	554818	3	553997
22492;1343	7	75089	75520	2	75089
12144;3252;14520;21437	6	166335	167371	4	166741
12605;40571;9082	9	404236	405449	3	404916
38143;19742	4	1220873	1221282	2	1220873
35459;14024;18995	15	945998	946653	3	946123
18106;27904;4850;31375	13	211676	212349	4	212349
12708;16253;11327;35937	16	767305	767894	4	767488
31966;16301;19618	7	406460	407217	3	406745
26943;25021	16	549773	550349	2	550349
2222;2895;5726;21519	14	493212	494559	4	493373
26807;25823;290;19512	13	403252	404174	4	403786
35971;16545;2875	2	635997	636586	3	636586
21443;40109	15	798311	798581	2	798581
35073;11037;2099;35152;25338	2	442358	444217	5	443585
32958;8006;4702	8	27936	29150	3	27936
10387;14568;30360;4226	11	453324	454179	4	453581
4625;36381;29720	5	465925	466367	3	466118
31935;39495;22582	11	484444	484824	3	484649
36854;36069;38077	16	803281	804393	3	804122
15799;7832	8	252240	252380	2	252380
21576;36671	5	476016	476213	2	476213
7272;35812;18618;27591	4	187913	188892	4	188101
736;1858	13	839623	840072	2	839623
27369;23108;38633;4331	2	303909	305195	4	304700
17907;37920;35665;5545;34785	11	496575	498085	5	497061
10795;25661;37289;11140;20551;26099;29757;8764	1	94187	95780	8	94838
41860;36028;29472;31021;23331	7	747668	749060	5	747877
37892;1028;26989	13	640436	640949	3	640635
34556;30741;22669;5083	8	7610	8520	4	7871
40371;11377	2	198691	198909	2	198691
34886;43764;14186;3156;14166;10157;28240	10	628213	630112	7	629210
28789;29236;1892	6	144113	144984	3	144984
24728;24028;31996	2	185813	186277	3	186035
3433;33243;1716;43757;34825;19739;43837	10	710726	712279	7	711627
9841;13073	6	100295	100454	2	100295
7013;9849	5	424579	425089	2	425089
33842;5691;9476;34015;40471	5	307273	308326	5	308024
31814;5229	11	500631	500740	2	500631
36715;26009;28210;28822;19353	4	1254271	1255369	5	1254610
25494;34928;43258	4	475860	476349	3	475860
38533;32584;9702	4	1414462	1415266	3	1414462
7591;15458	6	258548	258746	2	258746
35934;29781;2151;26818;7977	1	41671	42711	5	42107
37107;21838;31846;7477;11519	4	38267	39254	5	38537
41307;36863;31238;3576	4	1424176	1424808	4	1424176
26887;43395;16026;10692;10392	8	248142	249078	5	248398
2373;18619;33229	7	804969	805274	3	805061
3285;11271;40290;41134;8438;31658;959;22940	10	383463	386063	8	385465
36595;29076;39161;5004;14453;10169;28634;5796	11	419265	421018	8	419827
4872;29376;30336;13769;36608;8836;3790;36776;36947;42084;40938	9	347428	351375	11	350185
24863;8975	11	8270	8755	2	8755
17067;35681;2668;35817;33907;9105;36768;24339	12	999328	1000982	8	1000144
3390;10058	7	361586	362158	2	361586
37566;34713;19663	15	889405	889997	3	889405
8732;9952	14	561082	561391	2	561082
13918;6126;8743;33285;12685	7	186948	187780	5	187519
41105;32374;3336	13	94336	95403	3	94336
30526;20305;13422;37845;24636;17928;14554;30061	6	237299	239837	8	237299
1242;27616;43107;39988;12463;4064;21185	12	622801	624912	7	624912
13985;33078;8225;31149;12491;38026	16	576866	578265	6	577402
41097;14008	4	526390	526941	2	526941
29841;37708;5396	4	921685	922089	3	921828
36922;30714;17434;37215	12	662711	663578	4	663101
36606;1091;39532;12503;28739	8	514072	515217	5	515152
27077;18158;17694	15	854692	855083	3	854692
42984;36074;37388;15265;36213;20111	4	1283478	1284880	6	1284009
25135;7233;11688;2322	16	733111	733719	4	733245
18030;21286	2	119010	119280	2	119280
14279;20772	12	184850	185115	2	184850
10745;7748;26640;39139	9	385257	385973	4	385257
29169;11692	9	229907	230061	2	230061
16316;24553;2130;36086;151;42954;30591	11	470590	472485	7	471269
14352;39089;35805	4	376619	377713	3	377713
33124;13706;7221;10569	11	563906	564764	4	564601
15857;41043;22157;4917;39466;41672;30305	16	89798	91468	7	90330
30229;4595;41764;39827;6910;41110	14	679543	680660	6	680486
29474;21057	2	413367	414088	2	414088
9509;20894	15	888169	888332	2	888332
31593;9017;1709	13	778961	779388	3	779388
28655;31741;40264;3065;6334	10	408727	409873	5	409057
19002;284;37779;38973;7840;20116	2	211306	212823	6	212412
43643;9073	14	638952	639559	2	638952
20321;11674;36578;31223;43662	12	31412	32897	5	32188
17408;15778	8	119802	119987	2	119802
25106;17536	12	1026548	1026779	2	1026779
5328;23679;1285;35949;2522	7	585550	586854	5	586305
28992;5727;40821;32459	13	761596	762808	4	762315
8446;13213;40904;11565	16	691692	692655	4	691994
23502;8289	10	67576	67716	2	67716
19237;43844	12	530221	530395	2	530395
26170;27942;41571	4	1398298	1399030	3	1398298
28777;3736;38263;34520;6075;37998	12	51855	53049	6	52383
29918;30482;31264	2	460028	460634	3	460307
5399;40883;34884;29163;28016;12979;12758;732;41344	7	488873	491227	9	489739
35285;33819;29922	16	139082	139519	3	139519
357;21069;38197;12483	13	39040	40027	4	40027
41698;34541	14	49245	49482	2	49482
42479;4487;18303;37475;41481	16	167182	168401	5	167661
18730;37729;32444	14	179219	179839	3	179219
21196;5929;25522	5	273971	274414	3	273971
38739;5466;21627	15	991774	992902	3	992902
32446;14979	12	146101	146242	2	146242
6928;21833	12	683817	684083	2	683817
19249;40984;36676;20981	7	231517	232251	4	232251
39853;17551;37147;38539;6240;570;5147;1467;29643;13452	7	61848	64361	10	62033
43005;27310	16	161933	162540	2	162540
37465;34638;39830	10	452417	453263	3	453263
4477;7578;26442;8973;42769;31488	9	156168	157511	6	157368
14637;25212	9	57154	57369	2	57369
4031;34554	8	475414	475768	2	475768
10746;5015;9175;17125;28937;10124;1194;10463	4	1042389	1044573	8	1042962
1381;7456;3263;22548	16	192529	193254	4	193254
41938;37875;34910;17073;33502;23509;8310;26583;35231;25010;4884;20825;33061	15	307680	311687	13	309100
24446;6651;17288;7253;34660	16	182270	183310	5	182894
19600;34771	1	176018	176337	2	176018
40029;6959;32112;30470	13	499009	500097	4	499269
3049;38184;7345;18078;21412;2752	11	237606	239235	6	238698
28077;24488;6134	13	698442	698870	3	698442
2714;32143;3814	8	211592	212189	3	211909
42997;41453;4803;24390;42087	11	252163	253454	5	252870
10277;37624;22493;36057	10	515112	516332	4	516081
14694;41253;6720;20232;36345	5	78104	79391	5	79391
15021;43035	11	596257	596448	2	596257
27887;719	13	824611	824733	2	824611
22285;28561;5765	6	230894	231679	3	231167
8065;8038;42138;29503	16	232079	232738	4	232460
35994;38885	8	76531	76802	2	76802
6346;1586;35857;36712	4	279554	280633	4	280633
13556;42995;38268	9	355535	356034	3	355821
37768;31915	13	554182	554598	2	554598
35248;34481;37775	7	431325	431987	3	431325
8104;16341;2645;6665;13047;26841	11	325281	326368	6	325983
22000;12810;15875	12	748564	749032	3	749032
901;26953;15679;33017;34583;38600	8	363800	365256	6	364806
7695;30314;8902;30275;30436	7	1057066	1058015	5	1057712
33449;6257;33610	4	1088871	1089161	3	1088956
27686;15669;24210;29593	12	450137	451089	4	450579
24984;33101;30990;41655;4347;36031;17049;20020;1497	10	163375	165360	9	164080
8366;8075;33400	16	323054	323907	3	323907
14099;10091;22922;26826	13	277211	277872	4	277211
30710;37295	13	328647	328873	2	328647
40801;10318;42750;7979;9974	15	239922	241050	5	239922
14305;23701;32244;40947;7781;7133;31720;38906	7	169976	172260	8	171222
16723;40075	14	26321	26568	2	26568
42598;34826;26042	16	119966	120771	3	120171
25776;18972;1096	9	335939	336621	3	336621
27503;769;29010;17020;22702;15954;39370	11	24337	26664	7	26419
35266;34512;35589	16	748973	749481	3	749130
17103;43157;4344	13	54493	55314	3	54796
29871;37705	13	300318	300708	2	300708
33760;35486;40484;14417	16	219720	220535	4	220535
33350;3464;40239;23774	4	1077374	1078136	4	1077935
306;4353;15415;29077;14152	4	354820	356076	5	355417
18744;33087;27;14000	2	750637	751305	4	751091
14954;8785;10568;13727;18532;20454	12	435671	437454	6	437454
43264;10727;28530;35309;34169	13	520133	521859	5	520506
34123;21970;5135;7178;4195	3	291682	292977	5	292663
31437;20441;18621;21987;28765	6	68298	69163	5	69004
12485;21777;4924;22643	15	589302	590365	4	589302
1392;10570;41836;43909;10796;30175;24451;36935	8	197053	198756	8	197899
7722;4802;43175;12338;41867;2319;42575;22555;7390;2265;7061;35132;2406;36673	14	711806	716357	14	713157
12012;41272;13780;2600	4	1452523	1453447	4	1453447
34578;31955;7174;5592	2	92857	93611	4	93410
34821;13679	16	70745	71069	2	71069
40936;29787;12583;1551	16	547936	548480	4	548480
4073;27114;10174;23184;2262	7	52002	53200	5	52601
33132;39530;33863;19236;19619	1	185864	187173	5	185864
8043;43098;39434;26601	14	654433	655040	4	654693
11304;34004;17583	4	1357552	1357900	3	1357718
25583;37742;31702;42258	1	4140	5084	4	5084
6422;36633	7	790308	790501	2	790308
30474;10151;34699	4	1340210	1341086	3	1340210
6618;10928;26812	15	196360	197037	3	197037
42877;21826;42853;37235;36990	10	464072	465180	5	464072
41776;16767;7627	6	83232	84152	3	83906
4787;40963;29552;15308;30815;8152;36964	16	916048	918146	7	917019
42482;24613;17789;17459	10	602193	602849	4	602849
25037;36534	4	781470	782054	2	782054
18581;43739;42176	2	349618	350232	3	349618
33659;40311	16	780753	781101	2	781101
23778;2944;23848;6247;7528;33891	5	101265	102731	6	101859
23607;29458;36759;28570	2	694388	695154	4	694676
30320;35159;26905;6617	9	279103	279854	4	279854
4025;1295;23707;19642	2	9723	10755	4	9832
35533;32109;18862	10	306857	307526	3	306857
42158;40297;11666;39994;37801	15	626137	626957	5	626361
40225;19479;29323;3909;33490;25937;6688;14571	15	696931	698823	8	697820
21632;39234;10978;37726;13023;13022;34901;13814;5012;32450;3553;19910;6421;35180;16006;12517;1064	6	152520	159222	17	154439
32148;18599;19719	7	604478	604806	3	604478
27051;12551;40780;38500	9	251620	252427	4	251896
35797;30872;28559;37277;34438;23472;16500;25587;22725;2956;10860	4	143145	145740	11	144399
36000;42046;42510;24804	7	1005942	1006501	4	1006284
10069;30105;31660;1425;9246;35564;40412	12	335725	337311	7	336153
4023;39690	7	328231	328432	2	328231
27707;39794;16689;11676;29098;33495;15549;33617;2013	11	411221	414152	9	412554
41594;5491;41389;7595;28047	5	486961	488708	5	488223
39509;13874	15	827650	828054	2	827650
22650;5936;25164;29326;27168;8820;23401;13553;598	3	231343	234226	9	233052
17598;10465;21237;14016;13825	13	238795	239565	5	239383
12931;32947;32042;9277	15	294286	294923	4	294286
21673;36812	15	833674	834205	2	833674
10166;42033;43782	12	1015408	1016498	3	1016498
3621;43950	13	690325	691043	2	690325
2863;16488;36282;17669;28814;39087	14	315399	316894	6	315881
35212;43760;31001;2202;18964;19980;42748	15	580812	582893	7	581458
37390;39596;13594;37139;26424	13	362921	363784	5	363338
19328;39091;25286;10018;42365	13	825850	827227	5	826467
10630;40177;14025;4741;16997	9	376806	377769	5	377264
26298;41379;23616;10161	1	166154	166794	4	166544
16894;4531	8	413504	413655	2	413504
13729;3340;42317;33727;32518	7	240663	241513	5	241100
19738;42644;7774;22290;43661;43037;24521;8013;38339	10	651758	654367	9	652467
29864;32652	13	85815	85968	2	85815
38651;16930;36539;36166;34558	12	733739	734666	5	733965
15388;7572;225;10310	2	248524	249191	4	248524
28895;26693;10489;35736;35351	11	520670	522270	5	521383
42064;31769;27559	7	77791	78478	3	77791
32544;32960;27455;8326;2715;40895	4	203751	205263	6	205263
35577;40472;11845;18739;892;28037;5196	10	367607	369202	7	368312
31168;34805;10596;32973;42150	12	149602	151225	5	151225
25486;41455;8584;309	14	409905	410808	4	410137
18541;16460;11564;42286;8482;31710	13	801511	803168	6	803168
3315;13700;27599;28184;25952;31318;4320	2	78211	80107	7	79600
42193;3256;16591	12	160712	161594	3	161594
32682;3583	14	644513	644795	2	644513
33463;32650;40228	1	117940	118378	3	118378
23959;6659;4867;2551	12	72831	74121	4	72831
43588;40589	14	512378	512565	2	512378
13990;11289;36170;41012;21554;2547;32086;41984;42590	14	155063	157910	9	157431
7839;4399;18231	8	18434	18981	3	18769
35349;12990;8765;5692;38402	12	91434	92370	5	91739
41696;34440;21663	12	421200	421652	3	421388
14795;22562;28321;9647;10369;38419	12	181388	183589	6	181815
37205;29303	3	287952	288635	2	288635
24460;10777	10	537643	538128	2	537643
17169;9287;481	2	707524	707974	3	707974
3206;6288;24354;42075	4	733330	734855	4	734855
40068;21104	4	810284	810499	2	810499
4875;34783;10374;29087;28545;34807;1199	1	79242	80650	7	79636
31276;28990	2	389297	389756	2	389297
19264;28926;32963;18724	12	909416	910330	4	909416
3367;1341;34950	11	602213	602701	3	602701
30138;19073	10	99236	99771	2	99236
35594;25973;6600;8022	14	583388	584194	4	583388
12778;22348;31666	4	677253	678091	3	678091
2515;42646;40526;39072	12	138494	140620	4	139744
43557;6858;27497;17503;14026	15	333099	334840	5	334120
39206;6096;6667;1355;23142	6	148125	149027	5	149027
33211;33913;26141	14	485331	486488	3	486488
29300;29587;359	8	109796	110735	3	109956
40531;20397;5268	4	1480142	1480987	3	1480987
30807;38560;39422;15719;42564	2	282998	284329	5	283622
40352;42601;35625;38266	13	338842	340101	4	339055
6185;1076;21656;1943;10514	14	389568	390464	5	389800
32284;17486;4571;25948	12	775514	776721	4	776469
747;6874;22369;1236;25257	3	113651	114576	5	114172
42776;17826;18607;14420;37210;4325	13	56895	58831	6	57706
26800;41277;26609;33345;41163	10	566641	569246	5	568339
6658;34809;34377;23506	7	162781	163487	4	163068
28988;43476	16	613059	613262	2	613262
27515;30881	2	690345	690675	2	690675
43750;14516;32375;26372;26925;26736;40628;18915	8	183540	184949	8	184818
11548;6852	7	870186	870865	2	870186
9415;23159;7985;34129	2	675189	676493	4	676493
34153;15011;15013;11995;23933;17142;28159	14	291286	293020	7	291897
30325;43287;38774	7	145435	145982	3	145668
35911;5558;43407	11	585989	587066	3	587066
10598;37514;42542;43619;39923	12	845793	847267	5	847267
31416;40703;39386;21799;12657;22762;43084;13170	11	184536	187095	8	185217
14569;4671;27509	15	658541	659647	3	659647
803;32883	5	338936	339515	2	339515
18501;10970;1060	12	257578	257940	3	257940
4597;2988;566	16	125508	126083	3	125508
4593;40338	8	71683	72593	2	71683
36783;3449	8	147339	147698	2	147698
9090;10941;14076;18742;19403;34545;10070	7	220197	222090	7	220899
26874;27040	13	250883	251117	2	251117
16236;13181	12	888591	888818	2	888591
16445;37781	12	287856	288753	2	287856
23450;4665	7	425267	425390	2	425267
38569;19586;7861	3	293978	294933	3	294628
33084;37658;29547;37643	2	801933	802770	4	802261
7638;32248;4132;22755;19907;22221	15	188732	190528	6	189577
12719;20198	3	15262	15692	2	15692
25650;12628;39967;5585;43924	4	292182	293352	5	293352
37370;781;8490;19603;21231;42483	5	549718	551022	6	550354
11389;12313;16812;7460;2137;9450	2	516844	518030	6	517253
10903;26097;36699;5017;23863	9	264775	265746	5	264942
39834;38613;16239;28526;31298	13	467694	468766	5	468321
8888;23953	13	394771	394952	2	394771
19795;5954;3056;41230	7	393773	395418	4	394816
2509;23316	15	77770	78092	2	78092
35448;28835;36242;31234;42705	12	133064	134696	5	134696
11984;35363;23585;40583;32065;37088	16	649547	651116	6	649832
35999;18889;9774;3511;17483;31623	9	50179	51814	6	51441
6136;15668;24825;6694;22921;3226	7	349119	350666	6	349343
10603;11632	12	547233	547333	2	547233
39338;7438;26026;41624	12	895428	896610	4	896165
27229;8904;10021;23431;9610;31461;8122	10	588932	591049	7	590312
637;36760;5333;42333;12597;36408	15	454907	456109	6	455830
13423;14100	10	431007	431222	2	431007
31125;8208;29181;14733	14	672127	673353	4	672300
29223;13314	14	17527	17751	2	17751
5022;11642;2669;18215;11647;17086;484;3969	5	234679	236353	8	235814
35116;20963	9	186238	186468	2	186468
37652;625	13	147379	148104	2	147379
40287;7478;8422;24884;3700;26919;14065	14	532522	535197	7	533788
20104;27922	12	836311	836975	2	836311
43348;27760;17290	10	552605	553114	3	552995
41587;30351;26930;13040;27106;41770;43051;39131	14	359058	360782	8	360523
39972;2530;15737;31173;18400	4	1271724	1272917	5	1272917
9964;20615	16	210772	211015	2	210772
40242;6307;8768;43719;21164;32937;6918	15	1012322	1013952	7	1013152
5133;38727;11279;41736;9734;43008	7	935369	936858	6	935967
17616;37941;42782	14	42061	43130	3	42061
42805;23082;22130;27468	4	937028	937712	4	937712
8864;41457;16147;39025;12146;30197;8434;27508;36636	4	605617	608160	9	607333
6994;19791;5689;8251;22474;26445	15	563631	564935	6	564391
15188;32298;7080;30987;31295;38063	16	540430	542428	6	542428
30594;22300;33992;32854	9	105226	106164	4	105826
40534;1451;40717;12995;2842;26709	13	415153	416521	6	416164
19801;30630;11620;21684	12	1038800	1040043	4	1039284
4972;22976;16543;23805;33215	2	66396	67278	5	67079
12093;15641;28715;10324;41786	8	59127	60690	5	59583
32583;3240;23236;37174;18338;26341	13	888292	889936	6	888952
8958;7163;26054;37179;24607;26331;24350	2	149193	150765	7	150191
1447;14097	4	1292124	1292424	2	1292424
16372;7310;32369;28022;36777	13	161775	163068	5	162180
43902;22262	4	1495779	1496021	2	1495779
38964;15200;8448;32734;5102;40234;10728;22105	5	420261	421920	8	420795
36803;38708;4704;41675;33752	11	130345	131381	5	130345
22672;3668;30717;25601;1147;10008;15473;40045;36078;32801	6	132355	134702	10	134702
10071;23588;17948;34164	16	893644	894297	4	894297
2558;42323;37037;6695	14	94945	96383	4	94945
36628;14115	7	659845	660346	2	659845
9047;32233;27488;25685	3	37503	38312	4	37739
22311;37292;26743;5332;31470;21809;41834	13	669222	670803	7	669909
15446;27748	9	287541	287798	2	287798
4432;21273;37229;37938;8445;31646	7	259322	261740	6	260001
8411;19521;36704;13281;17805;11202;12737;42093;38518;40802	12	866792	868878	10	868465
17444;20187	4	825837	826032	2	825837
40974;771;21650;16342	16	660050	661170	4	661005
6857;13083;42596;2095	5	216734	218166	4	217617
7617;31394;21454;14346	8	410706	411380	4	410873
2211;23421;29797;23290;13904;18529;30574;35187;42529	11	530276	533229	9	531721
2051;27513;2663;43106	6	247857	248742	4	248515
41815;25936;8500	16	835279	835633	3	835475
36448;38757;40960;790;31134;8451	10	268804	270345	6	269523
27326;18851;24047;10910;31500	13	294252	296173	5	295160
830;1567;34146	3	296447	296939	3	296939
16459;26584	10	500142	500388	2	500142
30172;6968;34204	15	89283	90050	3	89283
